# Supplementary material
Source: Springer Nature journal article supplement (https://www.springermedizin.de/resource/supplementary/12913_2012_2594_MOESM1_ESM.pdf/9532118)
Supplement: MOESM1 [file 9532118]

Patient who dies within 72 hours of admission to study hospitals

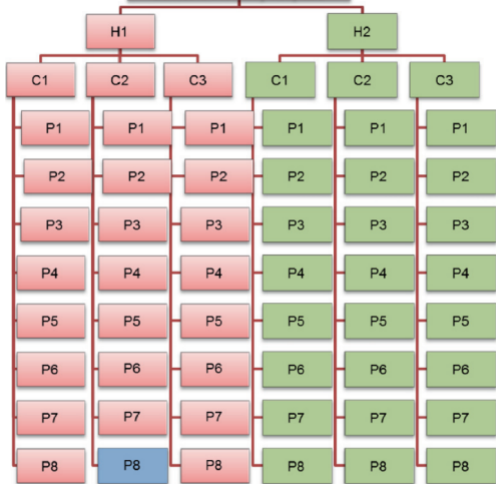

H= Hospital

C= Condition

P= Participant
